# Supplementary material for: Anomalous high adsorption energy of H2O on fluorinated graphenes: a first principles study
Source: Royal Society of Chemistry journal article supplement (doi:10.1039/c4cp01784f), 2014-01-01
Supplement: c4cp01784f1.pdf [file c4cp01784f1.pdf]

## Supporting Online Material

### Anomalous high adsorption energy of H<sub>2</sub>O on Fluorinated Graphenes: A First Principle Study

*Peng Wang, Hongtao Wang\*, Wei Yang\**

Institute of Applied Mechanics, Zhejiang University, Hangzhou 310027, China

---

\* To whom correspondence should be addressed. Email: [htw@zju.edu.cn](mailto:htw@zju.edu.cn) and [yangw@zju.edu.cn](mailto:yangw@zju.edu.cn)

## Supporting Figures

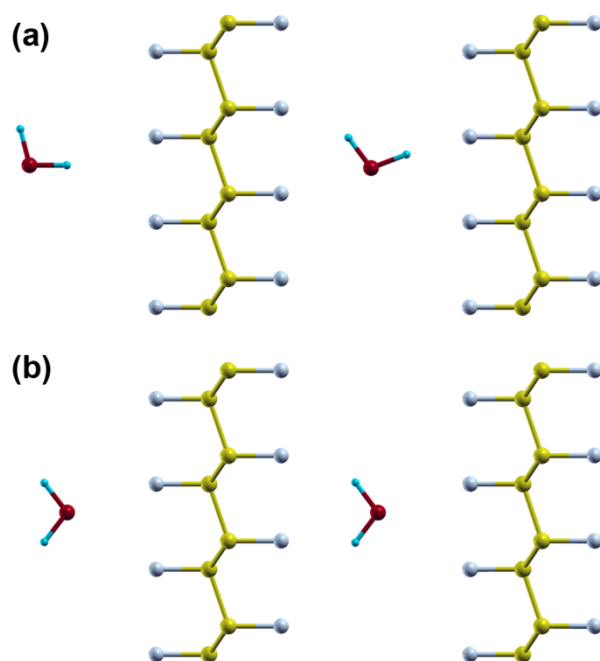

**Fig. S1.** The initial setups (left) and corresponding final configurations (right) of a  $\text{H}_2\text{O}$  molecule on CF: (a) No. 1, (b) No. 3.

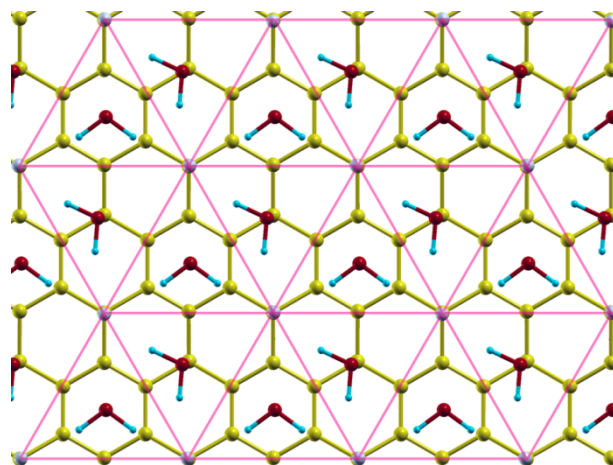

**Fig. S2.** The energetically favored positions of water molecules on C<sub>4</sub>F substrate. Each H<sub>2</sub>O molecule is positioned in the center of triangle, which is formed by three nearby F atoms.
